# Supplementary material for: Synthesis and properties of transition metal benzoporphyrin compound liquid crystalsElectronic supplementary information (ESI) available: CHN data, absorption spectral maxima (nm), and infrared spectral data of the ligands and complexes. See http://www.rsc.org/suppdata/jm/b3/b302308g/
Source: Royal Society of Chemistry journal article supplement (doi:10.1039/b302308g), 2003-01-01
Supplement: b302308g.doc [file b302308g.doc]

# Electronic Supporting Information

Tables S1-S3 are CHN data, absorption Spectral Maxima (nm), and infrared spectra data of the ligands and complexes

Table 1. Characteristic data of the ligands and complexes

| Compounds | Empirical formula | C  (%)* | H  (%)* | N  (%)* |
| --- | --- | --- | --- | --- |
| 6L | C60H70N4 | 85.28(85.11) | 8.21(8.27) | 6.50(6.62) |
| 8L | C68H86N4 | 85.34(85.17) | 8.89(8.98) | 5.81(5.85) |
| 10L | C76H102N4 | 85.08(85.23) | 9.59(9.53) | 5.25(5.23) |
| 12L | C84H118N4 | 85.31(85.28) | 9.85(9.98) | 4.69(4.74) |
| 14L | C92H134N4 | 85.33(85.32) | 10.32(10.36) | 4.28(4.33) |
| 16L | C100H150N4 | 85.43(85.35) | 10.71(10.67) | 3.91(3.98) |
| 18L | C108H166N4 | 85.45(85.38) | 10.89(10.94) | 3.64(3.69) |
| 6Zn | ZnC60H68N4 | 79.25(79.17) | 7.35(7.48) | 6.25(6.16) |
| 8Zn | ZnC68H84N4 | 79.75(79.89) | 8.05(8.22) | 4.61(5.48) |
| 10Zn | ZnC76H100N4 | 80.55(80.47) | 8.68(8.82) | 4.85(4.94) |
| 12Zn | ZnC84H116N4 | 81.06(80.94) | 9.41(9.31) | 4.39(4.50) |
| 14Zn | ZnC92H132N4 | 81.38(81.33) | 9.65(9.72) | 4.16(4.13) |
| 16Zn | ZnC100H148N4 | 81.75(81.67) | 9.95(10.07) | 3.70(3.81) |
| 18Zn | ZnC108H164N4 | 81.85(81.95) | 10.46(10.37) | 3.50(3.54) |
| 6Ni | NiC60H68N4 | 79.82(79.70) | 7.48(7.53) | 6.08(6.20) |
| 8Ni | NiC68H84N4 | 79.38(80.42) | 8.22(8.28) | 5.47(5.52) |
| 10Ni | NiC76H100N4 | 80.88(80.94) | 8.90(8.88) | 4.94(4.97) |
| 12Ni | NiC84H116N4 | 81.21(81.38) | 9.39(9.36) | 4.56(4.52) |
| 14Ni | NiC92H132N4 | 81.68(81.74) | 9.71(9.77) | 4.10(4.15) |
| 16Ni | NiC100H148N4 | 82.11(82.04) | 10.08(10.12) | 3.78(3.83) |
| 18Ni | NiC108H164N4 | 82.42(82.30) | 10.54(10.41) | 3.60(3.56) |
| 6Cu | CuC60H68N4 | 79.19(79.33) | 7.45(7.49) | 6.04(6.16) |
| 8Cu | CuC68H84N4 | 80.08(80.03) | 8.21(8.24) | 5.44(5.48) |
| 10Cu | CuC76H100N4 | 80.61(80.59) | 8.88(8.84) | 5.06(4.94) |
| 12Cu | CuC84H116N4 | 81.20(81.06) | 9.35(9.33) | 4.52(4.50) |
| 14Cu | CuC92H132N4 | 81.40(81.44) | 9.69(9.74) | 4.09(4.13) |
| 16Cu | CuC100H148N4 | 81.67(81.77) | 10.14(10.08) | 3.79(3.81) |
| 18Cu | CuC108H164N4 | 82.16(82.05) | 10.34(10.38) | 3.41(3.55) |
| 6MnCl | MnC60H68N4Cl | 77.19(77.05) | 7.34(7.28) | 5.90(5.99) |
| 8MnCl | MnC68H84N4Cl | 77.93(77.98) | 8.11(8.03) | 5.29(5.35) |
| 10MnCl | MnC76H100N4Cl | 78.63(78.73) | 8.58(8.63) | 4.91(4.83) |
| 12MnCl | MnC84H116N4Cl | 79.30(79.35) | 9.20(9.13) | 4.38(4.41) |
| 14MnCl | MnC92H132N4Cl | 79.92(79.86) | 9.49(9.55) | 4.12(4.05) |
| 16MnCl | MnC100H148N4Cl | 80.26(80.30) | 9.92(9.90) | 3.72(3.75) |
| 18MnCl | MnC108H164N4Cl | 80.61(80.68) | 9.82(9.86) | 3.44(3.49) |

*Theoretical values are given in parentheses.

Table 2.Absorption Spectral Maxima (nm)* of the ligand and complexes

Compounds B(soret) Q

6L 423 576 601 625 665

2.31×105 3.31×104  3.65×104  5.79×104 2.99×104

6Zn 425 572 625

2.28×105 3.65×104 5.76×104

6Ni 426 578 630

2.35×105 2.72×104 5.81×104

6Cu 427 577 630

2.30×105 3.21×104 5.73×104

6MnCl 428 577 627

2.29×105 3.22×104 5.89×104

* In chloroform at room temperature; Molar extinction coefficients under spectral bands

# Table 3. Infrared spectra of the ligand and complexes *

Compounds N-H C-H C-N C-H M**-N M-Cl

Stretch Stretch Stretch Deformation Stretch Stretch

Pyrrole meso- pyrrole benzo

metylene

6L 3318w 2850s 1323m 1096w

6Zn 2851s 1323m 1094w 250m

6Ni 2850s 1326m 1095w 251m

6Cu 2850s 1326m 1095w 250m

6MnCl 2851s 1326m 1095w 250m 322m

# *s, strong; w, weak; m, medium

# **M: Zn, Ni, Cu, Mn.

There are similar results for the samples whose central ions are identical with above-mentioned those in the Table 2 and 3.
